# Supplementary material for: Optimized Mealtime Insulin Dosing for Fat and Protein in Type 1 Diabetes: Application of a Model-Based Approach to Derive Insulin Doses for Open-Loop Diabetes Management
Source: Oxford University Press journal article supplement (doi:10.2337/dc15-2855), 2016-07-07
Supplement: dc152855supplementarydata.pdf [file dc152855supplementarydata.pdf]

SUPPLEMENTARY DATA

**Supplementary Appendix. Model Used For Optimal Model Predicted Bolus (MPB)**

Model optimization was based on the 3<sup>rd</sup> order insulin pharmacokinetic/pharmacodynamic model developed by Sherwin and colleagues (1) combined with the 1<sup>st</sup> order Bergman minimal model (2; 3), and a piecewise linear approximation of the 2<sup>nd</sup> order meal absorption model proposed by Hovorka and colleagues (4). The combined model allowed 9 parameters to be identified: 3 insulin PK/PD rate constants, the effect of glucose per se to increase glucose uptake and decrease endogenous glucose production ( $p_1$ ), insulin sensitivity normalized to insulin clearance ( $S_I$ ), 3 parameters characterizing the initial rise, maximum rate, and fall in glucose appearance following the meal ( $T_{rise}$ ,  $T_{constant}$ , and  $T_{decrease}$ ), and the glucose distribution space ( $V_G$ ). Model equations:

$$\frac{dI_{SC}}{dt} = \frac{1}{\tau_1} \Delta ID - \frac{1}{\tau_1} I_{SC}$$

$$\frac{dI_p}{dt} = \frac{1}{\tau_2} I_{SC} - \frac{1}{\tau_2} I_p$$

$$\frac{dI_{ISF}}{dt} = \frac{1}{\tau_3} I_p - \frac{1}{\tau_3} I_{ISF}$$

$$\frac{dG}{dt} = -[p_1 + S_I \Delta I_{ISF}]G + p_1 G_B + \frac{R_{A[MEAL]}}{V_G}$$

$$R_{A[MEAL]} = \text{if } T_{MEAL} \leq t < T_{rise} \text{ } SLOPE_1 [t - T_{MEAL}]$$

$$\text{if } T_{rise} \leq t < T_{constant} \text{ } R_{A[MAX]}$$

$$\text{if } T_{constant} \leq t \leq T_{decrease} \text{ } SLOPE_2 [t - T_{constant}]$$

were implemented in Microsoft Excel (Office 2013), with the added constraint that the total area under curve for  $R_{A[MEAL]}$  equal the grams of carbohydrate in the meal, and that  $SLOPE_1 = R_{A[MAX]}/[T_{rise} - T_{meal}]$  and  $SLOPE_2 = R_{A[MAX]}/[T_{constant} - T_{decrease}]$ . Parameters for each HFHP meal were obtained using a nonlinear generalized reduced gradient algorithm available in Microsoft Excel. We have previously used a similar model to characterize the effect of meal fat content on insulin requirements (5) and characterize intraday changes in metabolism (6; 7).

## SUPPLEMENTARY DATA

### Supplementary Appendix References

1. Sherwin RS, Kramer KJ, Tobin JD, Insel PA, Liljenquist JE, Berman M, Andres R: A model of the kinetics of insulin in man. *J Clin Invest* 1974;53:1481-1492
2. Bergman RN, Finegood DT, Ader M: Assessment of insulin sensitivity in vivo. *Endocr Rev* 1985;6:45-86
3. Caumo A, Bergman RN, Cobelli C: Insulin sensitivity from meal tolerance tests in normal subjects: a minimal model index. *J Clin Endocrinol Metab* 2000;85:4396-4402
4. Wilinska ME, Chassin LJ, Acerini CL, Allen JM, Dunger DB, Hovorka R: Simulation environment to evaluate closed-loop insulin delivery systems in type 1 diabetes. *J Diabetes Sci Technol* 2010;4:132-144
5. Laxminarayan S, Reifman J, Edwards SS, Wolpert H, Steil GM: Bolus Estimation-Rethinking the Effect of Meal Fat Content. *Diabetes Technol Ther* 2015;17:860-866
6. Kanderian SS, Weinzimer S, Voskanyan G, Steil GM: Identification of intraday metabolic profiles during closed-loop glucose control in individuals with type 1 diabetes. *J Diabetes Sci Technol* 2009;3:1047-1057
7. Kanderian SS, Weinzimer SA, Steil GM: The identifiable virtual patient model: comparison of simulation and clinical closed-loop study results. *J Diabetes Sci Technol* 2012;6:371-379

SUPPLEMENTARY DATA

**Supplementary Table 1.** Nutritional composition of test foods

| <b>Meal</b>                         | <b>Ingredient</b> | <b>Weight (g)</b> | <b>Energy (kCal)</b> | <b>CHO (g)</b> | <b>Glycemic Index (%)</b> | <b>Fat (g)</b> | <b>Protein (g)</b> |
|-------------------------------------|-------------------|-------------------|----------------------|----------------|---------------------------|----------------|--------------------|
| Low Fat,<br>Low Protein<br>(LFLP)   | Pizza Base        | 93                | 249                  | 46             | 52                        | 3              | 8                  |
|                                     | Marinara Sauce    | 42                | 24                   | 4              | -                         | 1              | 1                  |
|                                     | <b>TOTAL</b>      | <b>135</b>        | <b>273</b>           | <b>50</b>      |                           | <b>4</b>       | <b>9</b>           |
| High Fat,<br>High Protein<br>(HFHP) | Pizza Base        | 93                | 249                  | 46             | 52                        | 3              | 8                  |
|                                     | Marinara Sauce    | 42                | 24                   | 4              | -                         | 1              | 1                  |
|                                     | Cheese            | 125               | 491                  | 0              | -                         | 40             | 27                 |
|                                     | <b>TOTAL</b>      | <b>260</b>        | <b>764</b>           | <b>50</b>      |                           | <b>44</b>      | <b>36</b>          |
| <b>Difference</b>                   |                   |                   | <b>+ 491</b>         | <b>-</b>       |                           | <b>+ 40</b>    | <b>+ 27</b>        |

SUPPLEMENTARY DATA

**Supplementary Table 2.** Mealtime insulin dosing and 6 hour postprandial glucose profiles in 10 adults with type 1 diabetes.

|                                                              | <b>LFLP</b>  | <b>HFHP</b>  | <b>HFHP –<br/>Optimized<br/>Dose</b> |
|--------------------------------------------------------------|--------------|--------------|--------------------------------------|
| Mean Insulin Dose (units)                                    | 4.7          | 4.7          | 7.9                                  |
| Mean Insulin Combination<br>Wave Split (%/%)                 | 50/50        | 50/50        | 30/70                                |
| Mean Insulin Combination<br>Wave Duration (minutes)          | 120          | 120          | 144                                  |
| Glucose iAUC (mg/dL.min)                                     | 13320 ± 2960 | 27092 ± 1709 | 11712 ± 3172                         |
| Mean Incremental plasma<br>glucose (mg/dL)                   | +23 ± 11     | +73 ± 4      | +24 ± 11                             |
| Mean Incremental Peak<br>plasma glucose (mg/dL)              | +82 ± 13     | +118 ± 7     | +61 ± 13                             |
| Time to Mean Incremental<br>Peak plasma glucose<br>(minutes) | 105 ± 14     | 255 ± 21     | 207 ± 33                             |

LFLP = Low fat, low protein meal; HFHP = High fat, high protein meal; iAUC = incremental Area Under the Curve
